# Supplementary material for: Anxiety and Depression in Belgium during the First 15 Months of the COVID-19 Pandemic: A Longitudinal Study
Source: MDPI journal article supplement (doi:10.3390/bs12050141), 2022-05-12
Supplement: s1 [file s1]

## Supplementary Material

Table S1. Demographic information Belgian Health Interview Survey 2018

|                                      |                                         | N                | %     |
|--------------------------------------|-----------------------------------------|------------------|-------|
| Gender                               | Men                                     | 5588             | 48.1  |
|                                      | Women                                   | 6023             | 51.9  |
| Region                               | Flanders                                | 4296             | 37.0  |
|                                      | Brussels                                | 3099             | 26.7  |
|                                      | Walloon                                 | 4216             | 36.3  |
| Age                                  | 18-29                                   | 1387             | 14.7  |
|                                      | 30-49                                   | 3124             | 33.1  |
|                                      | 50-64                                   | 2545             | 27.0  |
|                                      | 65+                                     | 2383             | 25.2  |
| Average age $\pm$ standard deviation |                                         | 43.03 $\pm$ 23.7 |       |
| Household composition                | Single                                  | 2151             | 15.5  |
|                                      | One parent with child(ren)              | 1276             | 11.0  |
|                                      | Couple without child(ren)               | 2598             | 22.4  |
|                                      | Couple with child(ren)                  | 5017             | 43.2  |
|                                      | Other or unknown                        | 569              | 4.9   |
|                                      |                                         |                  |       |
| Work status                          | Paid job                                | 7643             | 65.87 |
|                                      | Unemployed                              | 386              | 3.3   |
|                                      | Sick or disabled                        | 470              | 4.1   |
|                                      | Student                                 | 10               | 0.09  |
|                                      | Retirement                              | 2497             | 21.5  |
|                                      | I do the housekeeping, without benefits | 385              | 3.3   |
|                                      | I am a family worker                    | 12               | 0.10  |
|                                      | Other                                   | 201              | 1.73  |
|                                      |                                         |                  |       |
| Education                            | Secondary degree (or lower)             | 2377             | 27.4  |
|                                      | Higher degree                           | 6301             | 72.6  |
