# Supplementary material for: Anxiety and Depression in Belgium during the First 15 Months of the COVID-19 Pandemic: A Longitudinal Study
Source: MDPI journal article supplement (doi:10.3390/bs12050141), 2022-05-12
Supplement: s1 [file s1]

## Supplementary Material

Table S2. Descriptive analysis missing data

| Variable                                  | N missing | %Missing |
|-------------------------------------------|-----------|----------|
| Anxiety (total score)                     | 75        | 0.68%    |
| Depression (total score)                  | 119       | 1.08%    |
| Gender                                    | 53        | 0.5%     |
| Region                                    | 79        | 0.72%    |
| Age                                       | 224       | 2.03%    |
| Household composition                     | 38        | 0.34%    |
| Work status                               | 498       | 4.5%     |
| Education                                 | 53        | 0.5%     |
| Social support                            | 712       | 6.46%    |
| Exposure COVID-19                         | 30        | 0.27%    |
| Appointment                               | 720       | 6.53%    |
| Psychologist/psychotherapist/psychiatrist |           |          |
| Personality trait                         | 306       | 2.78%    |
